# Supplementary material for: Micro-epidemiology and spatial heterogeneity of P. vivax parasitaemia in riverine communities of the Peruvian Amazon: A multilevel analysis
Source: PubMed Central journal article supplement (PMC5556029; doi:10.1038/s41598-017-07818-0), 2017-08-14
Supplement: 41598_2017_7818_MOESM1_ESM.pdf [file 41598_2017_7818_MOESM1_ESM.pdf]

# 1 **Micro-epidemiology and spatial heterogeneity of *P. vivax* parasitaemia in** 2 **riverine communities of the Peruvian Amazon: A multilevel analysis**

3  
4 Carrasco-Escobar Gabriel<sup>1,2,0</sup>, Gamboa Dionicia<sup>1,3,4</sup>, Castro Marcia C.<sup>5</sup>, Bangdiwala Shrikant I.<sup>6,7</sup>,  
5 Rodriguez Hugo<sup>8</sup>, Contreras-Mancilla Juan<sup>1</sup>, Alava Freddy<sup>8</sup>, Speybroeck Niko<sup>9</sup>, Lescano Andres  
6 G.<sup>2</sup>, Vinetz Joseph M.<sup>3,4,10</sup>, Rosas-Aguirre Angel<sup>3,9,\*</sup>, Llanos-Cuentas Alejandro<sup>2,3,0,\*</sup>

- 7  
8 1. Laboratorio ICEMR-Amazonia, Laboratorios de Investigación y Desarrollo, Facultad de Ciencias y  
9 Filosofía, Universidad Peruana Cayetano Heredia, Lima 31, Peru;  
10 2. Facultad de Salud Pública y Administración, Universidad Peruana Cayetano Heredia, Lima 31, Perú;  
11 3. Instituto de Medicina Tropical "Alexander von Humboldt", Universidad Peruana Cayetano Heredia, Lima  
12 31, Perú;  
13 4. Departamento de Ciencias Celulares y Moleculares, Facultad de Ciencias y Filosofía, Universidad  
14 Peruana Cayetano Heredia, Lima 31, Peru;  
15 5. Department of Global Health and Population, Harvard T.H. Chan School of Public Health, 665 Huntington  
16 Avenue, Building I, Room 1113, Boston, MA, USA;  
17 6. Department of Biostatistics, University of North Carolina Gillings School of Global Public Health, Chapel  
18 Hill, NC, USA;  
19 7. Department of Health Research Methods, Evidence and Impact, McMaster University, Hamilton, ON,  
20 Canada;  
21 8. Región de Salud Loreto, Iquitos, Loreto 160, Peru;  
22 9. Research Institute of Health and Society (IRSS), Université Catholique de Louvain, Brussels 1200,  
23 Belgium;  
24 10. Division of Infectious Diseases, Department of Medicine, University of California San Diego School of  
25 Medicine, La Jolla, California, USA;

## 30 <sup>0</sup> **Corresponding Authors**

31 Alejandro Llanos-Cuentas

32 E-mail: [alejandro.llanos.c@upch.pe](mailto:alejandro.llanos.c@upch.pe)

34 Gabriel Carrasco-Escobar

35 E-mail: [Gabriel.carrasco@upch.pe](mailto:Gabriel.carrasco@upch.pe)

37 **\* These authors contributed equally to this work.**

38 **Key Words:** Malaria, *Plasmodium vivax*, molecular epidemiology, sub-microscopic infections,  
39 spatial analysis, multilevel model, high-risk clusters, human mobility, human population movement.

40 **SUPPLEMENTARY TABLES AND FIGURES**

41 **Supplementary Table S1.** Common destinations of travel records self-reported by inhabitants from  
 42 Gamitanacocha (GC), Libertad (LI), Primero de Enero (PE), and Urco Miraño (UM).

43

| Communities          | GC         | LI         | PE         | UM         | Total       |
|----------------------|------------|------------|------------|------------|-------------|
| Individuals          | N=18       | N=33       | N=20       | N=25       | N=96        |
| Travels              | n=36 (%)   | n=84 (%)   | n=59 (%)   | n=82 (%)   | n=261 (%)   |
| <b>Destinations:</b> |            |            |            |            |             |
| Iquitos              | 2 (5.56)   | 7 (8.33)   | 5 (8.47)   | 47 (57.32) | 61 (23.37)  |
| Mazan                | 3 (8.33)   | 13 (15.48) | 1 (1.69)   | 12 (14.63) | 29 (11.11)  |
| Quebradas ^          | 10 (27.78) | 60 (71.43) | 38 (64.41) |            | 108 (41.38) |
| Yurimaguas           |            | 1 (1.19)   |            | 4 (4.88)   | 5 (1.92)    |
| Maucallacta          | 18 (50.00) |            |            |            | 18 (6.90)   |
| Paucarillo           | 2 (5.56)   |            |            |            | 2 (0.77)    |
| Pebas                | 1 (2.78)   |            |            |            | 1 (0.38)    |
| 14 de Julio          |            | 2 (2.38)   |            |            | 2 (0.77)    |
| Inganoyata           |            | 1 (1.19)   |            |            | 1 (0.38)    |
| Santa Cruz           |            |            | 14 (23.73) |            | 14 (5.36)   |
| Orosa River          |            |            | 1 (1.69)   |            | 1 (0.38)    |
| Sucusari             |            |            |            | 2 (2.44)   | 2 (0.77)    |
| Indiana              |            |            |            | 3 (3.66)   | 3 (1.15)    |
| Palmeras             |            |            |            | 6 (7.32)   | 6 (2.30)    |
| Pampa Hermoza        |            |            |            | 4 (4.88)   | 4 (1.53)    |
| Santa Teresa         |            |            |            | 4 (4.88)   | 4 (1.53)    |

^ Reported by parker

44 **Supplementary Table S2.** Random effects of multi-community null and multivariate model for  
45 *P. vivax* parasitaemia.

|                              | Var    | 95% CI              |
|------------------------------|--------|---------------------|
| <b>Null Model</b>            |        |                     |
| Household                    | 0.0151 | (0.00005 - 4.46881) |
| Individual                   | 0      | ( - )               |
| <b>Multi-community Model</b> |        |                     |
| Household                    | 0      | ( - )               |
| Individual                   | 0      | ( - )               |

Mixed-effect Poisson Models with only random intercepts; Var= Variance estimate by mixed-effects model.

46

47

48 **Supplementary Table S3.** Random effects of community-specific null and multivariate models for *P. vivax* parasitaemia.

|                                  | Gamitanacocho |        | Libertad |        | Primero de Enero |        | Urco Mirañó |                   |
|----------------------------------|---------------|--------|----------|--------|------------------|--------|-------------|-------------------|
|                                  | Var           | 95% CI | Var      | 95% CI | Var              | 95% CI | Var         | 95% CI            |
| <b>Null models</b>               |               |        |          |        |                  |        |             |                   |
| Household                        | 0             | (-)    | 0        | (-)    | 0                | (-)    | 0.0362      | (0.153 - 0.2142)  |
| Individual                       | 0             | (-)    | 0        | (-)    | 0                | (-)    | 0           | (-)               |
| <b>Community-Specific models</b> |               |        |          |        |                  |        |             |                   |
| Household                        | 0             | (-)    | 0        | (-)    | 0                | (-)    | 0.0219      | (0.0001 - 5.0111) |
| Individual                       | 0             | (-)    | 0        | (-)    | 0                | (-)    | 0.0000      | (-)               |

Mixed-effect Poisson Models with only random intercepts; Var= Variance estimate by mixed-effects model.

49  
50

51  
52  
53

**Supplementary Figure S1.** Multilevel structure of data collected in the study.

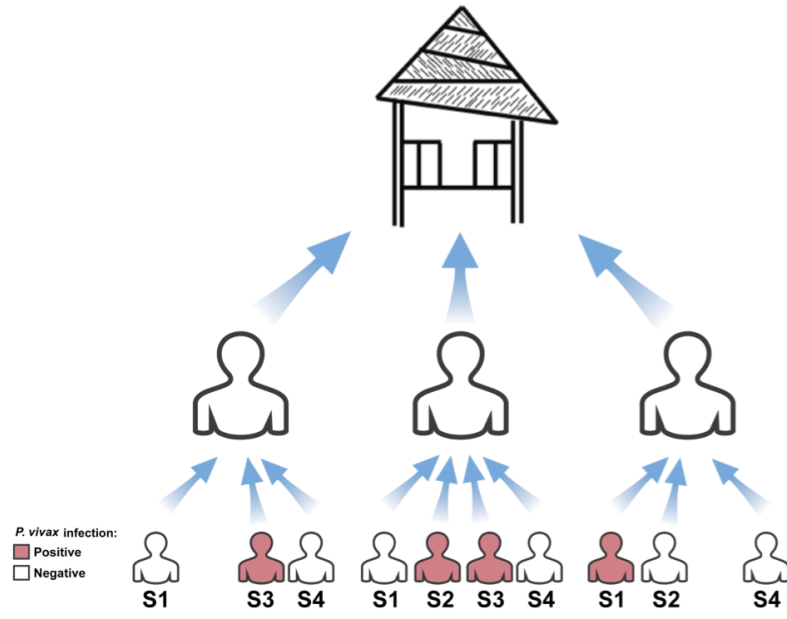

| Name of Level                                          | Subscript to index level | Variables measured on each member of the level                                                                         |
|--------------------------------------------------------|--------------------------|------------------------------------------------------------------------------------------------------------------------|
| Household<br>[154 Households]                          | $k$                      | HH structure, walls material, roof material, HH sprayed, electricity supply, livestock and high-risk cluster location. |
| Individual<br>[820 individuals]                        | $j$                      | Gender, age, education, outdoor occupation.                                                                            |
| Repeated observations in time<br>[up to 4 surveys (S)] | $i$                      | Travel history, fever symptom, <i>P. vivax</i> parasitaemia by PCR.                                                    |

HH=Household

54
